# Supplementary material
Source: PubMed Central journal article supplement (PMC4548889)
Supplement: NIHMS708772-supplement-Supplemental_materials.pdf [file NIHMS708772-supplement-Supplemental_materials.pdf]

Supplementary Table 1

*Moderation of the RLE-Health Problems (Complaints) Relationship by Exercise and Gender<sup>a</sup>*

| Model | Outcome                         | R <sup>2</sup> (adj.) | Recent Life Events (RLE) |        |       |         |          |      |      | Recent Life Events (adjusted models) <sup>e,f</sup> |                       |                         |        |       |         |          |      |      |
|-------|---------------------------------|-----------------------|--------------------------|--------|-------|---------|----------|------|------|-----------------------------------------------------|-----------------------|-------------------------|--------|-------|---------|----------|------|------|
|       |                                 |                       | Predictors               | B      | SE    | $\beta$ | <i>p</i> | TC   | VIF  | Model                                               | R <sup>2</sup> (adj.) | Predictors              | B      | SE    | $\beta$ | <i>p</i> | TC   | VIF  |
| 11a   | <b>Total health problems</b>    | 0.176                 | Stress <sup>b</sup>      | 0.305  | 0.045 | 0.317   | 0.000    | 0.99 | 1.01 | 11b                                                 | 0.220                 | Stress                  | 0.321  | 0.047 | 0.323   | 0.000    | 0.98 | 1.02 |
|       |                                 |                       | Exercise <sup>c</sup>    | -0.114 | 0.045 | -0.119  | 0.011    | 0.99 | 1.01 |                                                     |                       | Exercise                | -0.110 | 0.047 | -0.112  | 0.019    | 0.98 | 1.02 |
|       |                                 |                       | Gender <sup>d</sup>      | -0.204 | 0.045 | -0.211  | 0.000    | 0.99 | 1.01 |                                                     |                       | Gender                  | -0.238 | 0.046 | -0.245  | 0.000    | 0.98 | 1.03 |
| 12a   | <b>Physical Problems</b>        | 0.175                 | Stress                   | 0.253  | 0.041 | 0.301   | 0.000    | 0.90 | 1.11 | 12b                                                 | 0.212                 | Stress                  | 0.261  | 0.041 | 0.311   | 0.000    | 0.89 | 1.12 |
|       |                                 |                       | Exercise                 | -0.130 | 0.040 | -0.154  | 0.001    | 0.97 | 1.03 |                                                     |                       | Exercise                | -0.115 | 0.040 | -0.136  | 0.004    | 0.94 | 1.06 |
|       |                                 |                       | Gender                   | -0.161 | 0.040 | -0.191  | 0.000    | 0.98 | 1.02 |                                                     |                       | Gender                  | -0.168 | 0.039 | -0.199  | 0.000    | 0.98 | 1.03 |
|       |                                 |                       | Stress x Exercise        | 0.042  | 0.038 | 0.054   | 0.271    | 0.92 | 1.09 |                                                     |                       | Stress x Exercise       | 0.044  | 0.037 | 0.057   | 0.234    | 0.91 | 1.10 |
|       |                                 |                       | Exercise x Sex           | -0.030 | 0.040 | -0.036  | 0.451    | 0.97 | 1.03 |                                                     |                       | Exercise x Sex          | -0.009 | 0.040 | -0.011  | 0.816    | 0.95 | 1.05 |
|       |                                 |                       | Stress x Sex             | -0.024 | 0.041 | -0.029  | 0.554    | 0.91 | 1.1  |                                                     |                       | Stress x Sex            | -0.021 | 0.041 | -0.025  | 0.598    | 0.91 | 1.10 |
|       |                                 |                       | Stress x Exercise x Sex  | -0.076 | 0.038 | -0.098  | 0.045    | 0.92 | 1.09 |                                                     |                       | Stress x Exercise x Sex | -0.064 | 0.037 | -0.083  | 0.088    | 0.90 | 1.11 |
| 13a   | <b>Cardiovascular problems</b>  | 0.069                 | Stress                   | 0.109  | 0.036 | 0.214   | 0.003    | 1.00 | 1.00 | 13b                                                 | 0.259                 | Stress                  | 0.099  | 0.032 | 0.197   | 0.002    | 0.99 | 1.01 |
|       |                                 |                       | Exercise                 | -0.114 | 0.041 | -0.197  | 0.006    | 1.00 | 1.00 |                                                     |                       | Exercise                | -0.071 | 0.037 | -0.123  | 0.057    | 0.97 | 1.03 |
|       |                                 |                       | Gender                   | -0.029 | 0.040 | -0.050  | 0.476    | 1.00 | 1.00 |                                                     |                       | Gender                  | -0.053 | 0.036 | -0.093  | 0.147    | 1.00 | 1.01 |
| 14a   | <b>Musculoskeletal problems</b> | 0.048                 | Stress                   | 0.147  | 0.038 | 0.194   | 0.000    | 0.99 | 1.01 | 14b                                                 | 0.125                 | Stress                  | 0.161  | 0.038 | 0.215   | 0.000    | 0.98 | 1.02 |
|       |                                 |                       | Exercise                 | -0.083 | 0.038 | -0.108  | 0.030    | 0.99 | 1.01 |                                                     |                       | Exercise                | -0.064 | 0.038 | -0.085  | 0.095    | 0.97 | 1.03 |
|       |                                 |                       | Gender                   | -0.037 | 0.038 | -0.048  | 0.332    | 0.99 | 1.01 |                                                     |                       | Gender                  | -0.057 | 0.038 | -0.075  | 0.135    | 0.98 | 1.02 |
| 15a   | <b>Psychological problems</b>   | 0.130                 | Stress                   | 0.303  | 0.054 | 0.309   | 0.000    | 1.00 | 1.00 | 15b                                                 | 0.177                 | Stress                  | 0.279  | 0.056 | 0.287   | 0.000    | 0.99 | 1.01 |
|       |                                 |                       | Exercise                 | -0.053 | 0.056 | -0.052  | 0.348    | 1.00 | 1.00 |                                                     |                       | Exercise                | -0.062 | 0.058 | -0.061  | 0.286    | 0.98 | 1.02 |
|       |                                 |                       | Gender                   | -0.170 | 0.057 | -0.165  | 0.003    | 1.00 | 1.00 |                                                     |                       | Gender                  | -0.188 | 0.058 | -0.185  | 0.001    | 0.99 | 1.01 |

Note. <sup>a</sup> Non-significant interaction terms have been trimmed from the models, except in models 12a and 12b; <sup>b</sup> Stress is run as a z-score; <sup>c</sup> Exercise is run as a z-score; <sup>d</sup> Female = -1, Male = 1 (all models); <sup>e</sup> Models statistically adjusted for age, BMI, years of education, smoking (cigarettes/day), marital status (married, not married), employment status (employed, unemployed), household income, ethnicity (Caucasian, non-Caucasian); <sup>f</sup> Non-significant covariates were trimmed from adjusted models.

Supplementary Table 2

Moderation of the TLE-Health Problems (Complaints) Relationship by Exercise and Gender<sup>a</sup>

| Model | Outcome                         | R <sup>2</sup> (adj.) | Traumatic Experiences (TLE) |        |       |         |          |      |      | TLE (adjusted models) <sup>e,f</sup> |                       |            |        |       |         |          |      |      |
|-------|---------------------------------|-----------------------|-----------------------------|--------|-------|---------|----------|------|------|--------------------------------------|-----------------------|------------|--------|-------|---------|----------|------|------|
|       |                                 |                       | Predictors                  | B      | SE    | $\beta$ | <i>p</i> | TC   | VIF  | Model                                | R <sup>2</sup> (adj.) | Predictors | B      | SE    | $\beta$ | <i>p</i> | TC   | VIF  |
| 16a   | <b>Total health problems</b>    | 0.171                 | Stress <sup>b</sup>         | 0.305  | 0.045 | 0.317   | 0.000    | 0.99 | 1.01 | 16b                                  | 0.218                 | Stress     | 0.326  | 0.047 | 0.328   | 0.000    | 0.99 | 1.01 |
|       |                                 |                       | Exercise <sup>c</sup>       | -0.114 | 0.045 | -0.119  | 0.011    | 0.99 | 1.01 |                                      |                       | Exercise   | -0.107 | 0.047 | -0.110  | 0.022    | 0.98 | 1.02 |
|       |                                 |                       | Gender <sup>d</sup>         | -0.204 | 0.045 | -0.211  | 0.000    | 0.99 | 1.01 |                                      |                       | Gender     | -0.243 | 0.046 | -0.251  | 0.000    | 0.98 | 1.02 |
| 17a   | <b>Physical Problems</b>        | 0.128                 | Stress                      | 0.207  | 0.040 | 0.248   | 0.000    | 1.00 | 1.00 | 17b                                  | 0.163                 | Stress     | 0.208  | 0.041 | 0.249   | 0.000    | 0.91 | 1.10 |
|       |                                 |                       | Exercise                    | -0.117 | 0.040 | -0.139  | 0.004    | 0.99 | 1.01 |                                      |                       | Exercise   | -0.108 | 0.040 | -0.129  | 0.007    | 0.99 | 1.02 |
|       |                                 |                       | Gender                      | -0.193 | 0.041 | -0.228  | 0.000    | 0.99 | 1.01 |                                      |                       | Gender     | -0.205 | 0.040 | -0.243  | 0.000    | 0.98 | 1.02 |
| 18a   | <b>Cardiovascular problems</b>  | 0.060                 | Stress                      | 0.112  | 0.041 | 0.195   | 0.006    | 0.99 | 1.01 | 18b                                  | 0.229                 | Stress     | 0.059  | 0.038 | 0.104   | 0.124    | 0.93 | 1.08 |
|       |                                 |                       | Exercise                    | -0.118 | 0.041 | -0.203  | 0.005    | 0.99 | 1.01 |                                      |                       | Exercise   | -0.071 | 0.038 | -0.123  | 0.063    | 0.96 | 1.04 |
|       |                                 |                       | Gender                      | -0.039 | 0.041 | -0.068  | 0.338    | 1.00 | 1.00 |                                      |                       | Gender     | -0.059 | 0.037 | -0.103  | 0.115    | 0.99 | 1.01 |
| 19a   | <b>Musculoskeletal problems</b> | 0.033                 | Stress                      | 0.111  | 0.038 | 0.146   | 0.004    | 1.00 | 1.04 | 19b                                  | 0.064                 | Stress     | 0.086  | 0.038 | 0.113   | 0.026    | 0.97 | 1.04 |
|       |                                 |                       | Exercise                    | -0.085 | 0.039 | -0.111  | 0.028    | 0.99 | 1.01 |                                      |                       | Exercise   | -0.076 | 0.039 | -0.098  | 0.050    | 0.99 | 1.01 |
|       |                                 |                       | Gender                      | -0.054 | 0.039 | -0.071  | 0.160    | 0.99 | 1.01 |                                      |                       | Gender     | -0.057 | 0.039 | -0.074  | 0.139    | 0.99 | 1.01 |
| 20a   | <b>Psychological problems</b>   | 0.102                 | Stress                      | 0.278  | 0.057 | 0.272   | 0.000    | 1.00 | 1.00 | 20b                                  | 0.167                 | Stress     | 0.304  | 0.061 | 0.298   | 0.000    | 0.89 | 1.12 |
|       |                                 |                       | Exercise                    | -0.060 | 0.057 | -0.059  | 0.292    | 1.00 | 1.00 |                                      |                       | Exercise   | -0.067 | 0.058 | -0.066  | 0.251    | 0.98 | 1.02 |
|       |                                 |                       | Gender                      | -0.196 | 0.058 | -0.191  | 0.001    | 1.00 | 1.00 |                                      |                       | Gender     | -0.212 | 0.058 | -0.209  | 0.000    | 0.99 | 1.01 |

Note. <sup>a</sup> Non-significant interaction terms have been trimmed from the models; <sup>b</sup> Stress is run as a z-score; <sup>c</sup> Exercise is run as a z-score; <sup>d</sup> Female = -1, Male = 1 (all models); <sup>e</sup> Models statistically adjusted for age, BMI, years of education, smoking (cigarettes/day), marital status (married, not married), employment status (employed, unemployed), household income, ethnicity (Caucasian, non-Caucasian); <sup>f</sup> Non-significant covariates were trimmed from adjusted models.
